# Supplementary material
Source: HighWire-hosted journal article supplement (https://bmjopenquality.bmj.com/highwire/filestream/136054/field_highwire_adjunct_files/1/ds4837.xlsx)
Supplement: ds4837.xlsx [file ds4837.xlsx]

## Sheet: Sheet1
Table 1. Number of patients managed in line with guideline recommendations
	Initial Spot Audit (n=40)	At 2 weeks (n=30)	At 2 months (n=36)	P value
Oxygen prescribed	17/40 (42%)	7/30 (23%)	11/36 (31%)	0.223
Antibiotics prescribed with indication and stop/review date	14/24 (58%)	9/13 (69%)	10/16 (63%)	0.808
Appropriate DVT prophylaxis with relevant paperwork	32/40 (82%)	26/30 (87%)	32/36 (89%)	0.53
Cannula care plan	11/28 (39%)	20/25 (80%)	19/28 (68%)	0.007
Oxygen prescribing in patients with working diagnosis or past medical history of respiratory or cardiac related disorder.	13/21 (62%)	6/13 (46%)	8/13 (62%)	0.626
